# Supplementary material
Source: PubMed Central journal article supplement (PMC6428579)
Supplement: NIHMS974555-supplement-1.pdf [file NIHMS974555-supplement-1.pdf]

## Supplementary Figure 1

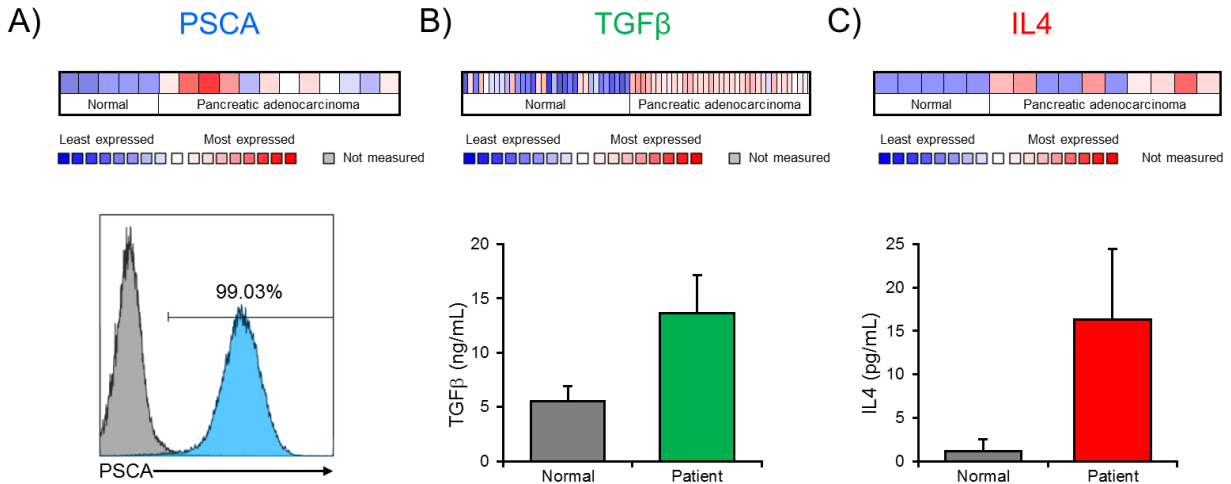

### Supplementary Figure 1. PSCA, TGFβ and IL4 overexpression at the pancreatic tumor site

**(a)** Heat maps obtained from oncomine data analysis tool demonstrating PSCA expression in pancreatic cancer patient samples (n=12) compared to normal donors (n=5). Histogram below depicts PSCA antibody staining (blue peak) compared to isotype control (grey peak) of CAPAN-1- a pancreatic tumor cell line. **(b)** Oncomine analysis of TGFβ expression in PDAC vs normal donors (n=39). ELISA evaluating TGFβ cytokine levels in serum obtained from PDAC patients (n=12) and normal control (n=6). **(c)** Heat map derived from oncomine data analysis tool comparing IL4 expression in PDAC vs normal donors. IL4 cytokine levels in patient serum (n=7) vs normal (n=3) donors measured by ELISA. Analysis and visualization of heat maps in panels **a-c** were performed using the Oncomine™ platform. Graphs in **(b)** and **(c)** represent mean±SEM.
