# Supplementary material
Source: PubMed Central journal article supplement (PMC6428579)
Supplement: NIHMS974555-supplement-2.pdf [file NIHMS974555-supplement-2.pdf]

## Supplementary Figure 2

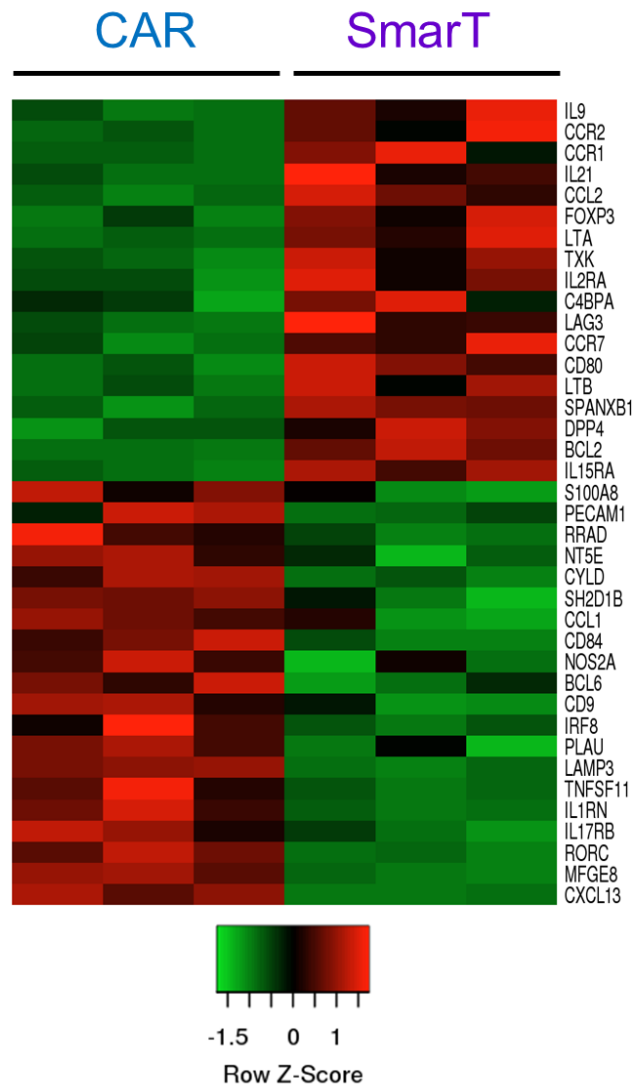

### Supplementary Figure 2. Differential gene expression profile of SmarT-cells vs CAR T cells

Heat map of differentially expressed genes ( $p < 0.05$ ) in SmarT-cells compared to control 1G.CAR

T cells stimulated with PSCA, TGF $\beta$  and IL4 (two-fold change).
