# Supplementary material
Source: PubMed Central journal article supplement (PMC6428579)
Supplement: NIHMS974555-supplement-3.pdf [file NIHMS974555-supplement-3.pdf]

Supplementary Figure 3

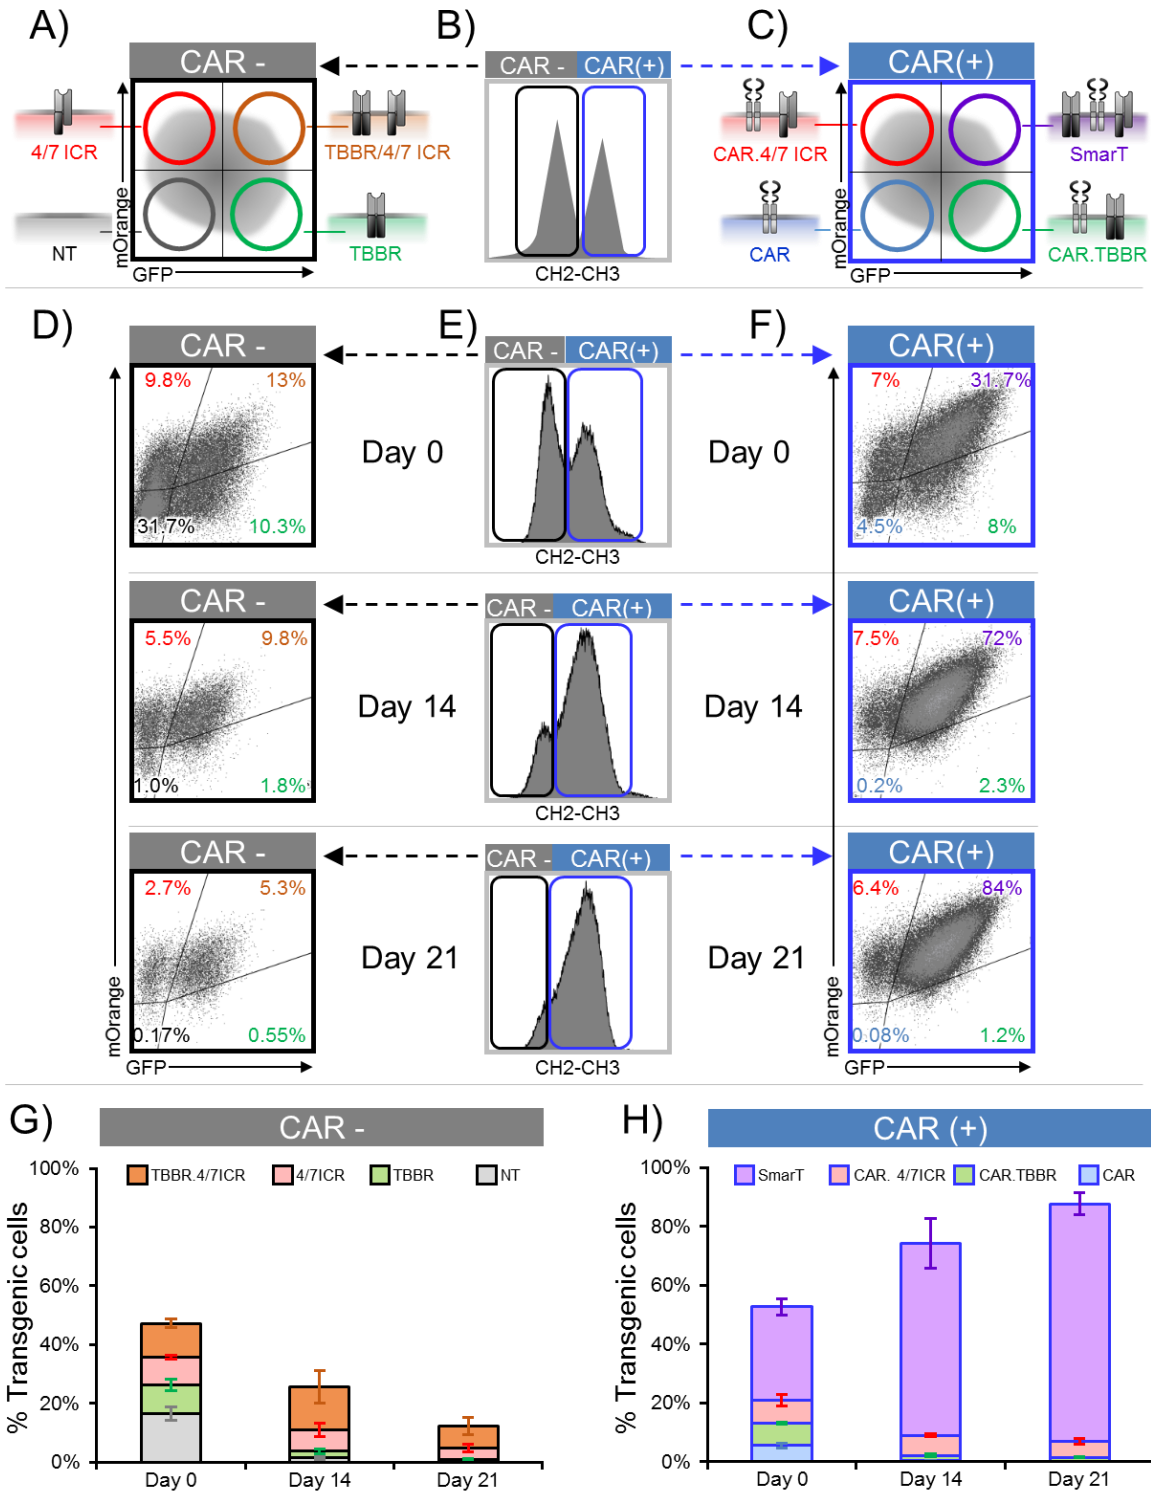

**Supplementary Figure 3. Selective enrichment process of CAR- and CAR+ transgenic sub-populations**

(a, b, c) Schematic representation of transgenic sub-populations and gating strategy to identify CAR- (NT, TBBR only, 4/7 ICR only, TBBR.4/7 ICR) and CAR+ (CAR, CAR.4/7 ICR, CAR.TBBR and CAR.TBBR.4/7 ICR+) T cell fractions. (d, e, f) Representative donor depicting the selective enrichment process of CAR- and CAR+ transgenic sub-populations upon exposure to PSCA, IL4 and TGF $\beta$ . Average percentage of each transgenic subset gated from CAR negative (g) and CAR positive (h) fractions (n=3, mean $\pm$ SD).
