# Supplementary material
Source: PubMed Central journal article supplement (PMC6428579)
Supplement: NIHMS974555-supplement-4.pdf [file NIHMS974555-supplement-4.pdf]

Supplementary Figure 4

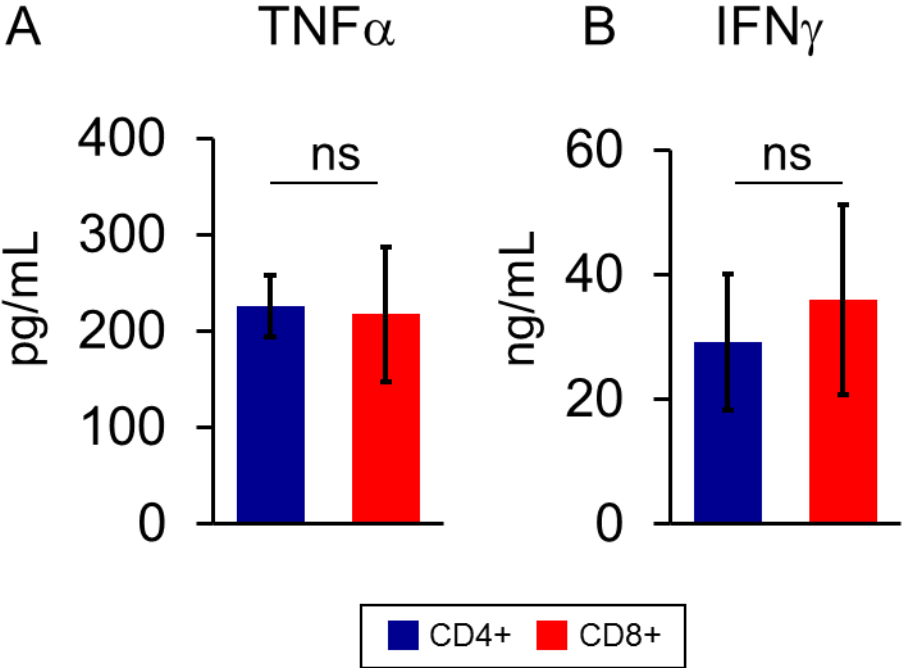

**Supplementary Figure 4. TNF $\alpha$  and IFN $\gamma$  levels from CD4+ and CD8+ sorted SmarT-cells**  
**(a-b)** TNF $\alpha$  and IFN $\gamma$  cytokine levels from sorted CD4+ and CD8+ SmarT-cells cultured in tumor milieu conditions for 10 days, and detected in supernatant collected 24 hours post-stimulation with PSCA, TGF $\beta$  and IL4. Significance was determined using a student's two-tailed t-test (ns = not significant).
