# Supplementary material
Source: PubMed Central journal article supplement (PMC6428579)
Supplement: NIHMS974555-supplement-6.pdf [file NIHMS974555-supplement-6.pdf]

## Supplementary Figure 6

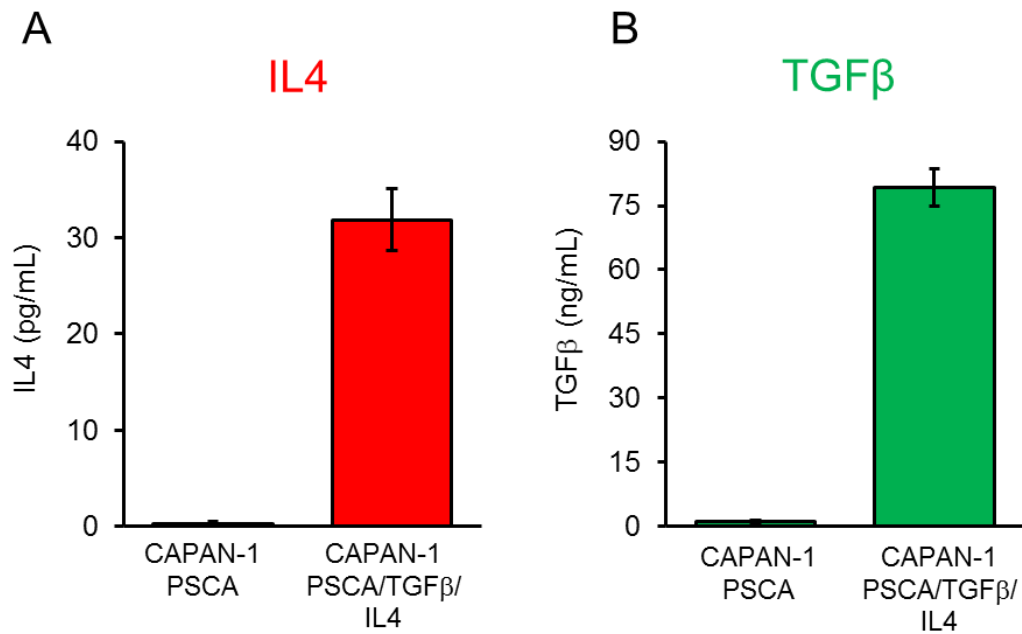

### Supplementary Figure 6. Levels of IL4 and TGFβ cytokines produced by CAPAN-1 PSCA/TGFβ/IL4 cell line

(a) IL4 and (b) TGFβ cytokine produced by CAPAN-1 PSCA cells transduced to express IL4-IRES-mOrange and TGFβ-IRES-deltaCD19 retroviral vectors.
