# Supplementary material
Source: PubMed Central journal article supplement (PMC6428579)
Supplement: NIHMS974555-supplement-7.pdf [file NIHMS974555-supplement-7.pdf]

## Supplementary Table 1

| Lymphocyte activation |         |         |             | Activation of immune response |        |         |             | Cell adhesion |         |         |             |
|-----------------------|---------|---------|-------------|-------------------------------|--------|---------|-------------|---------------|---------|---------|-------------|
| Rank                  | Gene    | p-value | Fold change | Rank                          | Gene   | p-value | Fold change | Rank          | Gene    | p-value | Fold change |
| 1                     | BATF    | 0.00001 | 6.31564     | 1                             | DUSP6  | 0.00002 | 6.39359     | 1             | IL21    | 0.00014 | 8.20000     |
| 2                     | MIF     | 0.00007 | 2.68925     | 2                             | TANK   | 0.00020 | 1.69235     | 2             | IL2RA   | 0.00037 | 7.70668     |
| 3                     | NFATC2  | 0.00008 | 0.40405     | 3                             | IRAK1  | 0.00057 | 1.63217     | 3             | C1QBP   | 0.00039 | 3.79258     |
| 4                     | INPP5D  | 0.00028 | 0.31780     | 4                             | CHUK   | 0.00080 | 1.59486     | 4             | CCL28   | 0.00010 | 2.43756     |
| 5                     | TNFSF12 | 0.00002 | 0.30456     | 5                             | HRAS   | 0.00004 | 1.58111     | 5             | BCL10   | 0.00036 | 0.62896     |
| 6                     | CASP8   | 0.00001 | 0.23611     | 6                             | CREB1  | 0.00037 | 0.58528     | 6             | IRF1    | 0.00027 | 0.62762     |
| 7                     | SMAD3   | 0.00002 | 0.23043     | 7                             | CD3E   | 0.00023 | 0.49823     | 7             | CD46    | 0.00033 | 0.52342     |
| 8                     | RORA    | 0.00001 | 0.14902     | 8                             | ZAP70  | 0.00068 | 0.46392     | 8             | SPN     | 0.00022 | 0.48806     |
|                       |         |         |             | 9                             | CTSS   | 0.00024 | 0.30270     | 9             | JAK2    | 0.00086 | 0.45576     |
|                       |         |         |             | 10                            | PLA2G6 | 0.00002 | 0.22338     | 10            | TGFB1   | 0.00006 | 0.44888     |
|                       |         |         |             | 11                            | TLR3   | 0.00045 | 0.13067     | 11            | IL12RB1 | 0.00021 | 0.39881     |
|                       |         |         |             |                               |        |         |             | 12            | ITGA4   | 0.00098 | 0.37128     |
|                       |         |         |             |                               |        |         |             | 13            | ITGAL   | 0.00013 | 0.32985     |
|                       |         |         |             |                               |        |         |             | 14            | CCR2    | 0.00049 | 0.29760     |
|                       |         |         |             |                               |        |         |             | 15            | CD44    | 0.00097 | 0.21387     |

**Supplementary Table 1. Differentially expressed genes ( $p < 0.05$ ) in CAR compared to delta CAR T cells.** The table displays the p-values and fold changes of genes that are differentially regulated in CAR T cells compared to the truncated CAR ( $\Delta$ CAR) control T cells collected 24 hours post-stimulation with PSCA. Genes were grouped based on their associated functions determined from string db analysis tool ( $n=3$ ) ( $p < 0.05$ ).

## Supplementary Table 2

| NF-kappaB signaling |       |         |             | Regulation of TNFSF |      |         |             | Cellular metabolic process |        |         |             |
|---------------------|-------|---------|-------------|---------------------|------|---------|-------------|----------------------------|--------|---------|-------------|
| Rank                | Gene  | p-value | Fold change | Rank                | Gene | p-value | Fold change | Rank                       | Gene   | p-value | Fold change |
| 1                   | NLRP3 | 0.01166 | 1.69284     | 1                   | SPN  | 0.00905 | 1.28560     | 1                          | CMKLR1 | 0.04847 | 1.75794     |
| 2                   | CASP1 | 0.04651 | 0.83313     | 2                   | LTF  | 0.00255 | 0.74510     | 2                          | DUSP4  | 0.00980 | 1.34147     |
| 3                   | STAT1 | 0.02229 | 0.78497     | 3                   | CD86 | 0.03931 | 0.71570     | 3                          | BCL2   | 0.01526 | 1.26568     |
| 4                   | BST2  | 0.01404 | 0.77540     | 4                   | CCL3 | 0.03233 | 0.69981     | 4                          | STAT5B | 0.04845 | 1.20929     |
|                     |       |         |             | 5                   | CCR2 | 0.00023 | 0.52036     | 5                          | PSMB7  | 0.04310 | 0.89055     |
|                     |       |         |             |                     |      |         |             | 6                          | G6PD   | 0.01572 | 0.89041     |
|                     |       |         |             |                     |      |         |             | 7                          | PSMD7  | 0.02141 | 0.89006     |
|                     |       |         |             |                     |      |         |             | 8                          | ATG5   | 0.04347 | 0.87810     |
|                     |       |         |             |                     |      |         |             | 9                          | PBK    | 0.04691 | 0.83074     |
|                     |       |         |             |                     |      |         |             | 10                         | TP53   | 0.01337 | 0.83038     |
|                     |       |         |             |                     |      |         |             | 11                         | C1QBP  | 0.00566 | 0.75221     |
|                     |       |         |             |                     |      |         |             | 12                         | CCL4   | 0.00636 | 0.74713     |
|                     |       |         |             |                     |      |         |             | 13                         | IFNA8  | 0.01686 | 0.61924     |
|                     |       |         |             |                     |      |         |             | 14                         | IFIT1  | 0.04117 | 0.53138     |

**Supplementary Table 2. Differentially expressed genes ( $p < 0.05$ ) in TBBR compared to delta TGF $\beta$ RII modified T cells.** The table lists differential expressed genes (DEGs) between TBBR and  $\Delta$ TGF $\beta$ RII modified T cells stimulated with OKT3 and TGF $\beta$  cytokine ( $p < 0.05$ ). The function associated signaling networks associated with the DEGs were determined using STRING database (db) (n=3).

### Supplementary Table 3

| JAK-STAT cascade |        |         |             | Lymphocyte proliferation |         |         |             | Cytokine production |         |         |             |
|------------------|--------|---------|-------------|--------------------------|---------|---------|-------------|---------------------|---------|---------|-------------|
| Rank             | Gene   | p-value | Fold change | Rank                     | Gene    | p-value | Fold change | Rank                | Gene    | p-value | Fold change |
| 1                | IL19   | 0.04520 | 2.45052     | 1                        | ARG1    | 0.04753 | 2.16003     | 1                   | CXCL5   | 0.03693 | 1.36654     |
| 2                | CSF2   | 0.01371 | 1.83445     | 2                        | PLA2G1B | 0.01024 | 1.55416     | 2                   | IL22RA1 | 0.00526 | 1.26789     |
| 3                | SOCS1  | 0.02039 | 1.67744     | 3                        | VEGFA   | 0.00599 | 1.49535     | 3                   | CXCR4   | 0.01259 | 1.19831     |
| 4                | CSF1R  | 0.00816 | 1.53951     | 4                        | FLT3LG  | 0.03730 | 1.15909     | 4                   | MAPK14  | 0.01463 | 1.09217     |
| 5                | CCL2   | 0.01770 | 1.21465     | 5                        | CDKN1A  | 0.03531 | 1.26588     | 5                   | STAT6   | 0.01977 | 0.93082     |
| 6                | NOTCH1 | 0.04556 | 0.77239     | 6                        | CASP3   | 0.01407 | 1.18780     | 6                   | SPN     | 0.03023 | 0.87074     |
| 7                | STAT1  | 0.00292 | 0.76702     | 7                        | BCL2L1  | 0.03732 | 1.16588     | 7                   | IL17RA  | 0.03528 | 0.85572     |
| 8                | STAT4  | 0.00136 | 0.73604     | 8                        | ZNF143  | 0.04132 | 1.10166     | 8                   | CD86    | 0.03351 | 0.80072     |
|                  |        |         |             |                          |         |         |             | 9                   | CASP1   | 0.01743 | 0.76780     |
|                  |        |         |             |                          |         |         |             | 10                  | DDX58   | 0.01224 | 0.76092     |
|                  |        |         |             |                          |         |         |             | 11                  | NLRC5   | 0.03423 | 0.62027     |
|                  |        |         |             |                          |         |         |             | 12                  | NCAM1   | 0.02562 | 0.58143     |
|                  |        |         |             |                          |         |         |             | 13                  | TLR3    | 0.03589 | 0.42504     |

**Supplementary Table 3. Differentially expressed genes ( $p < 0.05$ ) in 4/7 ICR compared to delta IL4R modified T cells.** Significance (p-value) and fold change of genes that are differentially expressed between 4/7 ICR and  $\Delta$ IL4R modified T cells stimulated with OKT3 and IL4 cytokine. Genes have been grouped based on functional networks determined using STRING db analysis tool. (n=3) ( $p < 0.05$ ).

## Supplementary Table 4

| CAR  |         |         |             | TBBR |        |         |             | 4/7 ICR |        |         |             |
|------|---------|---------|-------------|------|--------|---------|-------------|---------|--------|---------|-------------|
| Rank | Gene    | p-value | Fold change | Rank | Gene   | p-value | Fold change | Rank    | Gene   | p-value | Fold change |
| 1    | IL2RA   | 0.01477 | 13.32763    | 1    | CCL3   | 0.03181 | 15.79317    | 1       | CSF2   | 0.03940 | 16.99487    |
| 2    | DUSP6   | 0.00778 | 9.57425     | 2    | CCL4   | 0.01903 | 6.39590     | 2       | CCL2   | 0.01253 | 10.85138    |
| 3    | BATF    | 0.04896 | 4.72133     | 3    | CCR2   | 0.05831 | 3.84391     | 3       | SOCS1  | 0.00713 | 5.13013     |
| 4    | IL21    | 0.04677 | 3.33443     | 4    | BCL2   | 0.00447 | 1.76164     | 4       | CDKN1A | 5.05E-7 | 4.13059     |
| 5    | MIF     | 0.03236 | 2.20167     | 5    | TP53   | 0.01122 | 1.49902     | 5       | BCL2L1 | 0.00979 | 2.17212     |
| 6    | TANK    | 0.02974 | 1.99637     | 6    | LTF    | 0.03867 | 1.46036     | 6       | ARG1   | 0.03461 | 2.08442     |
| 7    | HRAS    | 0.00047 | 1.70011     | 7    | DUSP4  | 0.00360 | 1.45452     | 7       | DDX58  | 0.02432 | 2.04402     |
| 8    | CHUK    | 0.00801 | 1.41085     | 8    | CMKLR1 | 0.19400 | 1.38347     | 8       | TLR3   | 0.19625 | 2.01499     |
| 9    | IRAK1   | 0.43088 | 0.99306     | 9    | PSMD7  | 0.01098 | 1.28820     | 9       | CASP3  | 0.00031 | 1.98805     |
| 10   | TGFB1   | 0.12229 | 0.86157     | 10   | PSMB7  | 0.06284 | 1.17150     | 10      | NLRC5  | 0.08879 | 1.30742     |
| 11   | BCL10   | 0.04982 | 0.75627     | 11   | PBK    | 0.16090 | 1.13191     | 11      | NOTCH1 | 0.04014 | 1.22677     |
| 12   | IRF1    | 0.00014 | 0.74149     | 12   | CASP1  | 0.27511 | 1.09822     | 12      | ZNF143 | 0.04066 | 1.21487     |
| 13   | TNFSF12 | 0.00230 | 0.70405     | 13   | ATG5   | 0.07984 | 0.90254     | 13      | MAPK14 | 0.25013 | 1.07945     |
| 14   | CD3E    | 0.03022 | 0.66686     | 14   | SPN    | 0.03377 | 0.80330     | 14      | STAT4  | 0.43740 | 0.98766     |
| 15   | CD44    | 0.00481 | 0.65741     | 15   | G6PD   | 0.02245 | 0.78725     | 15      | STAT6  | 0.21784 | 0.90802     |
| 16   | CD46    | 0.00109 | 0.60341     | 16   | C1QB   | 0.16813 | 0.78088     | 16      | IL17RA | 0.18260 | 0.89115     |
| 17   | JAK2    | 0.00199 | 0.52032     | 17   | STAT5B | 0.00479 | 0.59476     | 17      | VEGFA  | 0.22705 | 0.85792     |
| 18   | IL12RB1 | 0.02097 | 0.45613     | 18   | STAT1  | 0.01211 | 0.57119     | 18      | CXCR4  | 0.16216 | 0.81951     |
| 19   | ZAP70   | 0.00145 | 0.39058     |      |        |         |             |         |        |         |             |
| 20   | ITGAL   | 0.00018 | 0.36587     |      |        |         |             |         |        |         |             |
| 21   | CTSS    | 0.00060 | 0.35997     |      |        |         |             |         |        |         |             |
| 22   | INPP5D  | 0.00024 | 0.34951     |      |        |         |             |         |        |         |             |
| 23   | ITGA4   | 0.00155 | 0.25875     |      |        |         |             |         |        |         |             |
| 24   | PLA2G6  | 0.00001 | 0.22654     |      |        |         |             |         |        |         |             |
| 25   | RORA    | 0.00609 | 0.20701     |      |        |         |             |         |        |         |             |
| 26   | CASP8   | 0.00001 | 0.20290     |      |        |         |             |         |        |         |             |
| 27   | SMAD3   | 0.00002 | 0.19891     |      |        |         |             |         |        |         |             |

**Supplementary Table 4. Differentially expressed genes in SmarT-cells derived from CAR, TBBR and 4/7 ICR.** The table lists the p-values and fold changes of differentially expressed genes detected in SmarT-cells compared to T cells expressing delta constructs ( $\Delta$ CAR,  $\Delta$ TGF $\beta$ RII,  $\Delta$ IL4R) after exposure to tumor milieu conditions (24 hours) that can be assigned to CAR, TBBR or 4/7 ICR transgenic modifications (n=3) (p<0.05).

**Supplementary Table 5.**

| Upregulated genes |         |             |           |         |             |          |         |             |
|-------------------|---------|-------------|-----------|---------|-------------|----------|---------|-------------|
| Gene              | p-value | Fold change | Gene      | p-value | Fold change | Gene     | p-value | Fold change |
| IL9               | 0.02412 | 8.40800     | TNFSF13   | 0.01299 | 1.78735     | FCGR2A   | 0.01908 | 1.47436     |
| CCR2              | 0.04527 | 6.37143     | IL32      | 0.02585 | 1.74563     | IRF1     | 0.00444 | 1.47194     |
| CCR1              | 0.04544 | 5.76865     | IL12RB2   | 0.02558 | 1.74345     | C1QA     | 0.03023 | 1.40849     |
| IL21              | 0.03726 | 4.47172     | IFITM2    | 0.01553 | 1.74328     | IL22RA2  | 0.04904 | 1.37973     |
| CCL2              | 0.01325 | 4.33887     | CSF1      | 0.02374 | 1.73504     | ENG      | 0.00847 | 1.35841     |
| FOXP3             | 0.01929 | 4.29318     | IFIH1     | 0.02680 | 1.72643     | MAGEA3   | 0.04587 | 1.35342     |
| LTA               | 0.01992 | 3.73705     | TNFSF12   | 0.01129 | 1.70176     | SYCP1    | 0.03548 | 1.33794     |
| TXK               | 0.01727 | 3.15756     | TLR2      | 0.00526 | 1.68688     | TFRC     | 0.01879 | 1.32969     |
| IL2RA             | 0.02202 | 2.72891     | CASP1     | 0.02977 | 1.66851     | CD47     | 0.02645 | 1.32499     |
| C4BPA             | 0.04509 | 2.72515     | STAT3     | 0.00356 | 1.63571     | PSMB10   | 0.00150 | 1.31674     |
| LAG3              | 0.03285 | 2.59591     | TNFRSF10B | 0.00302 | 1.63226     | IRAK1    | 0.00386 | 1.27685     |
| CCR7              | 0.02044 | 2.50383     | ITGAM     | 0.00294 | 1.62514     | ALCAM    | 0.02144 | 1.27375     |
| CD80              | 0.00532 | 2.26825     | CCND3     | 0.01708 | 1.62390     | IL6ST    | 0.01208 | 1.25675     |
| LTB               | 0.03077 | 2.23740     | CEACAM6   | 0.04695 | 1.59298     | IL11RA   | 0.02040 | 1.25605     |
| SPANXB1           | 0.00023 | 2.11869     | IFI35     | 0.04859 | 1.59226     | MAP2K1   | 0.03751 | 1.23536     |
| DPP4              | 0.01219 | 2.02176     | CLECT7A   | 0.02934 | 1.57527     | ITK      | 0.02702 | 1.20188     |
| BCL2              | 0.00512 | 1.99821     | JAK3      | 0.04295 | 1.57088     | GPI      | 0.00974 | 1.19833     |
| IL15RA            | 0.00345 | 1.99633     | CTAGE1    | 0.04269 | 1.56144     | CD164    | 0.03184 | 1.19528     |
| SBNO2             | 0.03078 | 1.99203     | TAP2      | 0.04911 | 1.56070     | FADD     | 0.04633 | 1.17836     |
| CD40              | 0.01499 | 1.91753     | FCGR1A    | 0.00206 | 1.55637     | TIRAP    | 0.01213 | 1.17157     |
| CD7               | 0.03037 | 1.91666     | SLAMF1    | 0.01188 | 1.55321     | CD37     | 0.04890 | 1.17117     |
| IL10              | 0.04308 | 1.91484     | STAT2     | 0.01165 | 1.52294     | ECSIT    | 0.02412 | 1.15736     |
| TBX21             | 0.03397 | 1.90425     | AIRE      | 0.04572 | 1.52124     | ETS1     | 0.02932 | 1.14494     |
| TNFSF15           | 0.04742 | 1.90325     | CCL8      | 0.04059 | 1.50864     | TRAF2    | 0.03612 | 1.13595     |
| CD48              | 0.00654 | 1.87069     | MASP1     | 0.00086 | 1.50668     | MAPKAPK2 | 0.04509 | 1.13198     |
| MAGEC1            | 0.04639 | 1.82597     | TXNIP     | 0.04836 | 1.50616     | MYD88    | 0.04173 | 1.13135     |
| CDKN1A            | 0.00554 | 1.80615     | TRAF6     | 0.04445 | 1.50479     | ATG16L1  | 0.03780 | 1.12603     |
| ANXA1             | 0.02267 | 1.79993     | CCL7      | 0.02742 | 1.48915     | TAPBP    | 0.02786 | 1.11212     |
| CCL14             | 0.03035 | 1.79836     | CYFIP2    | 0.04604 | 1.48239     | EWSR1    | 0.03392 | 1.06884     |

  

| Downregulated genes |         |             |          |         |             |         |         |             |
|---------------------|---------|-------------|----------|---------|-------------|---------|---------|-------------|
| Gene                | p-value | Fold change | Gene     | p-value | Fold change | Gene    | p-value | Fold change |
| ZAP70               | 0.00383 | 0.86366     | TNFRSF18 | 0.02237 | 0.66279     | RRAD    | 0.02794 | 0.46494     |
| TOLLIP              | 0.01939 | 0.85707     | DEFB1    | 0.03759 | 0.65637     | NT5E    | 0.00887 | 0.46176     |
| CDK1                | 0.04280 | 0.82742     | GZMA     | 0.03634 | 0.65544     | CYLD    | 0.00424 | 0.45922     |
| SMAD2               | 0.01978 | 0.82346     | CD276    | 0.04728 | 0.64833     | SH2D1B  | 0.01851 | 0.45444     |
| GTF3C1              | 0.00041 | 0.81933     | SLAMF6   | 0.02414 | 0.62577     | CCL1    | 0.03865 | 0.44846     |
| REPS1               | 0.04963 | 0.81773     | REL      | 0.00872 | 0.61835     | CD84    | 0.00678 | 0.43102     |
| HMGB1               | 0.00546 | 0.81019     | POU2AF1  | 0.02950 | 0.61199     | NOS2A   | 0.03355 | 0.41355     |
| IFNAR2              | 0.01279 | 0.79173     | ITGAE    | 0.03460 | 0.60903     | BCL6    | 0.00690 | 0.40137     |
| TTK                 | 0.00289 | 0.78922     | EGR2     | 0.01013 | 0.58633     | CD9     | 0.00993 | 0.38489     |
| LCP1                | 0.00403 | 0.75663     | AMICA1   | 0.03696 | 0.58003     | IRF8    | 0.04414 | 0.37857     |
| NFKB1               | 0.02817 | 0.75643     | ITGA1    | 0.01409 | 0.55799     | PLAU    | 0.02134 | 0.37498     |
| MERTK               | 0.02800 | 0.73912     | XCL2     | 0.02238 | 0.54706     | LAMP3   | 0.00002 | 0.28230     |
| THBD                | 0.04863 | 0.71705     | PRKCD    | 0.04153 | 0.54646     | TNFSF11 | 0.02687 | 0.27282     |
| NFATC3              | 0.00857 | 0.70715     | CCR4     | 0.04100 | 0.54135     | IL1RN   | 0.01390 | 0.23265     |
| CKLF                | 0.01173 | 0.70221     | C1S      | 0.02701 | 0.51653     | IL17RB  | 0.01023 | 0.22728     |
| CD97                | 0.01802 | 0.68297     | CD83     | 0.00722 | 0.51124     | RORC    | 0.00490 | 0.18600     |
| TNFRSF9             | 0.01761 | 0.66643     | S100A8   | 0.02188 | 0.49114     | MFGE8   | 0.00136 | 0.17545     |
| RUNX1               | 0.02796 | 0.66609     | PECAM1   | 0.04728 | 0.47934     | CXCL13  | 0.00357 | 0.05956     |

**Supplementary Table 5. Differentially expressed genes in SmarT-cells compared to 1G.CAR T cells.** List of genes detected in SmarT-cells vs 1G.CAR T cells collected 24 hours after stimulation with PSCA, TGF $\beta$  and IL4 (n=3) (p<0.05).
